# Supplementary material for: A reversible turn-off fluorescence probe (HNAPP) for Zn(ii) ion and inorganic phosphate ions (H2P and HP) at physiological pH
Source: Royal Society of Chemistry journal article supplement (doi:10.1039/c5ra07613g), 2015-01-01
Supplement: c5ra07613g1.pdf [file c5ra07613g1.pdf]

## Supporting Information

A turn off and reversible fluorescence probe (HNAPP) for Zn(II) ion towards inorganic phosphate ions ( $\text{H}_2\text{P}$  and  $\text{HP}$ ) at physiological pH†

*Amar Hens\**

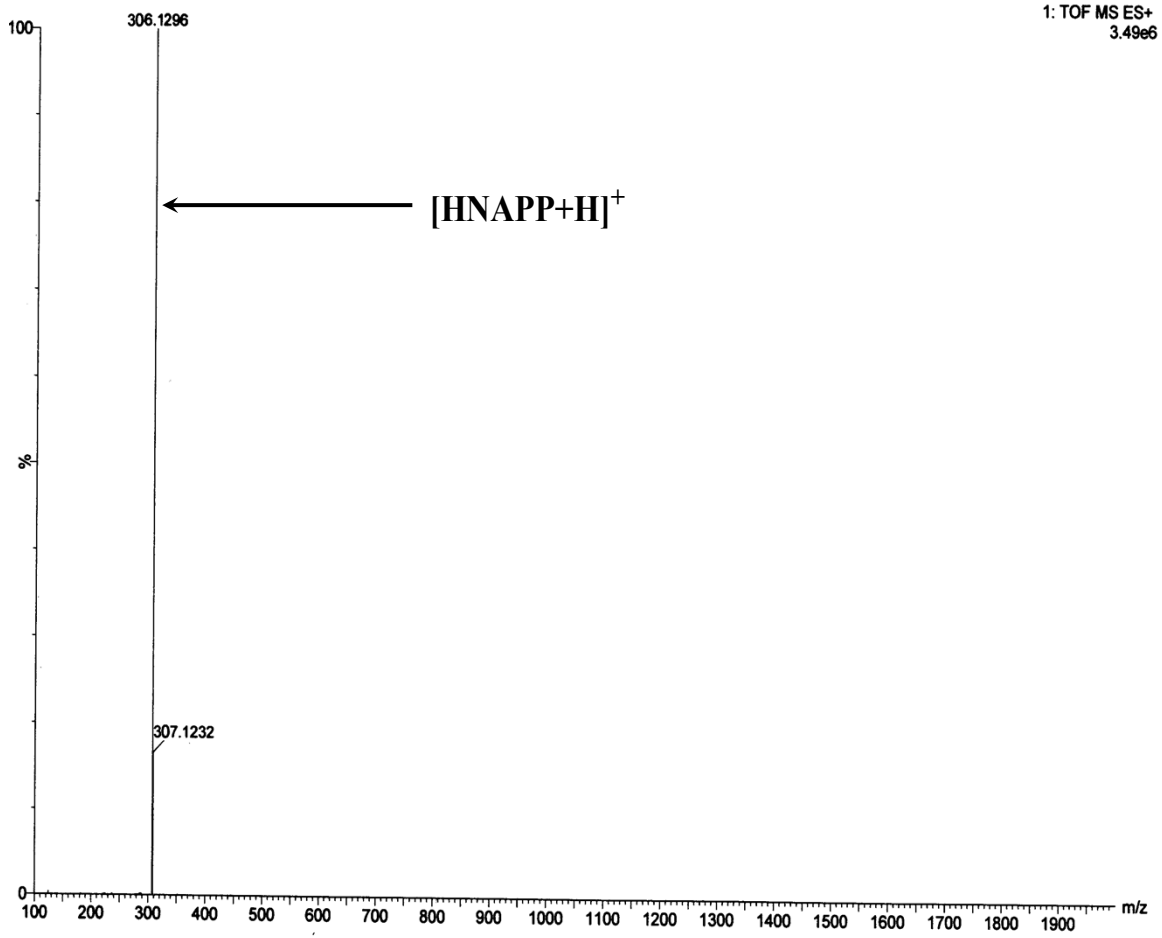

**Fig. S1** High-resolution mass spectrum of a solution containing HNAPP in acetonitrile.

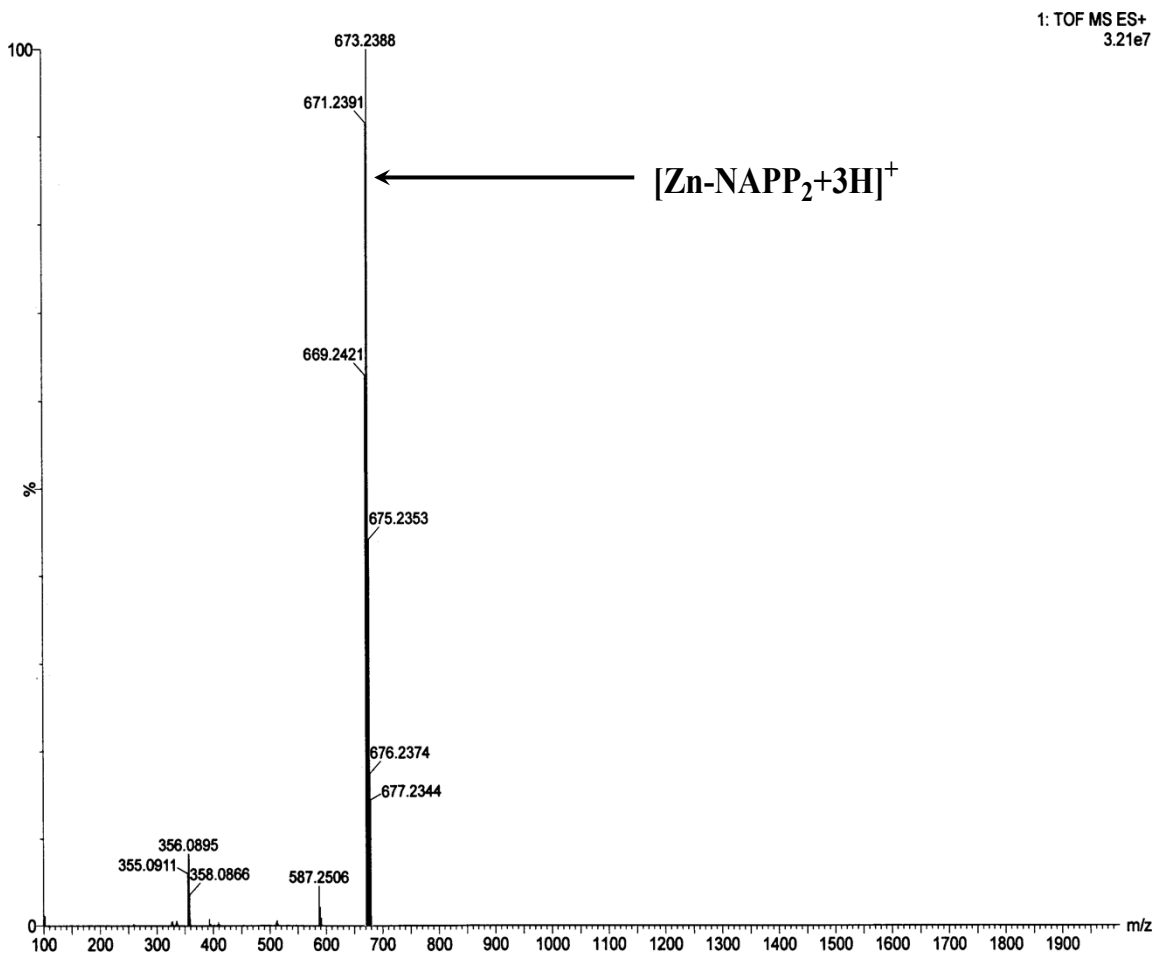

**Fig. S2** High-resolution mass spectrum of a solution containing Zn-NAPP<sub>2</sub> in acetonitrile.

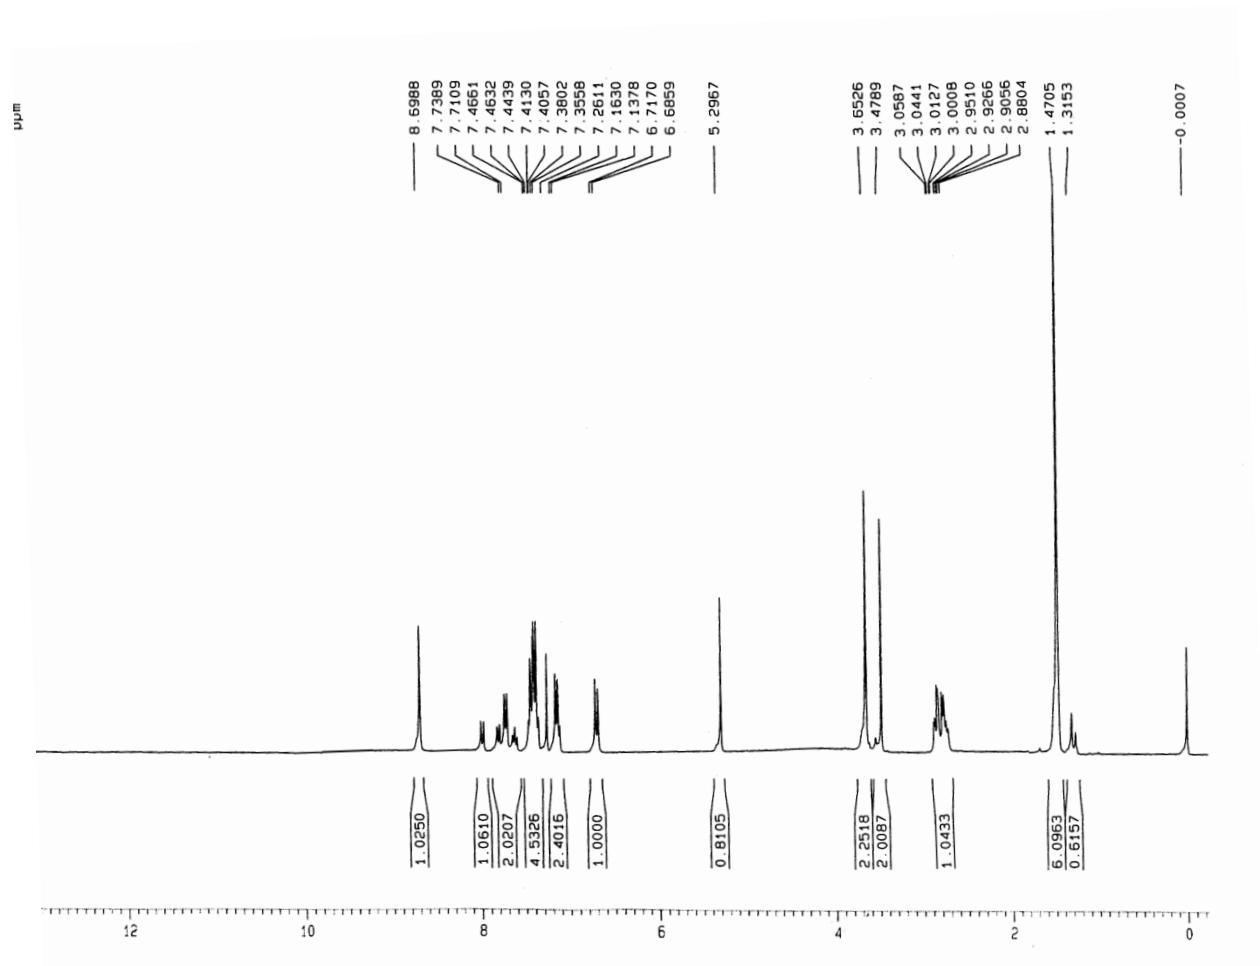

**Fig. S3** The <sup>1</sup>H NMR spectra of Zn-NAPP<sub>2</sub> with their spectral nature of both aromatic and aliphatic region.

**Table S1** Selected parameters for the vertical excitation (UV-Vis absorptions) of enol form and keto form of HNAPP; electronic excitation energies (eV) and oscillator strengths (*f*), configurations of the low-lying excited states; calculation of the S<sub>0</sub>–S<sub>1</sub> energy gaps based on optimized ground-state geometries (UV-Vis absorption)

| Tautomeric Form | Electronic Transitions          | Composition | Excitation energy | Oscillator strength ( <i>f</i> ) | CI      | λ <sub>theo</sub> (nm) |
|-----------------|---------------------------------|-------------|-------------------|----------------------------------|---------|------------------------|
| ENOL            | S <sub>0</sub> → S <sub>1</sub> | HOMO → LUMO | 3.0818eV          | 0.4255                           | 0.70344 | 405                    |
| KETO            | S <sub>0</sub> → S <sub>1</sub> | HOMO → LUMO | 3.9945eV          | 0.5897                           | 0.68807 | 315                    |

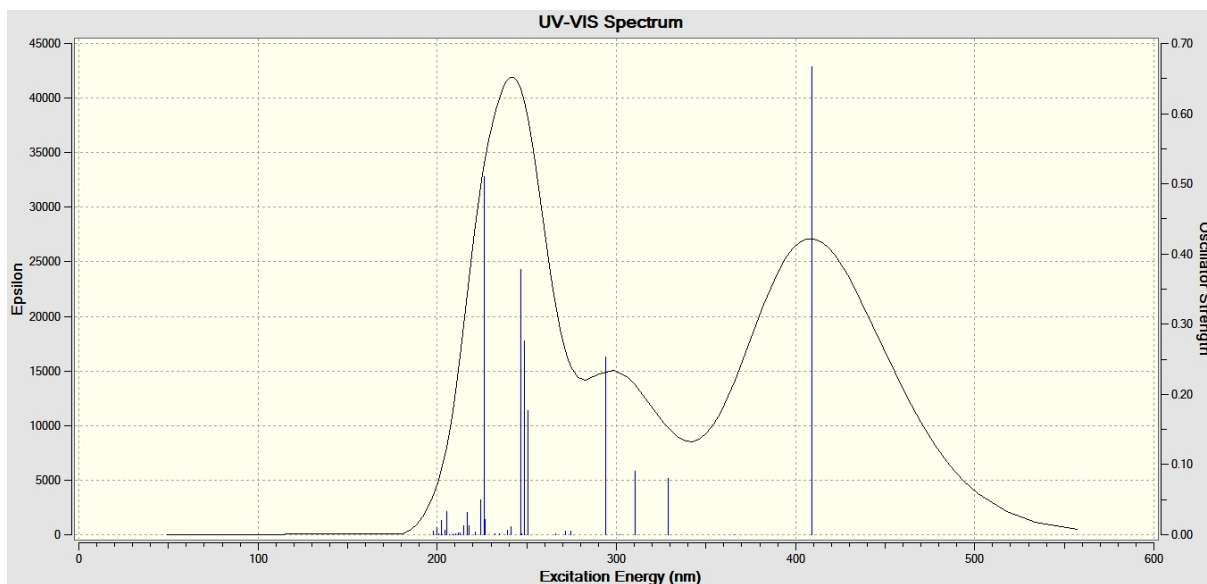

**Fig. S4.** The theoretical UV-Vis spectra for HNAPP of ENOL form.

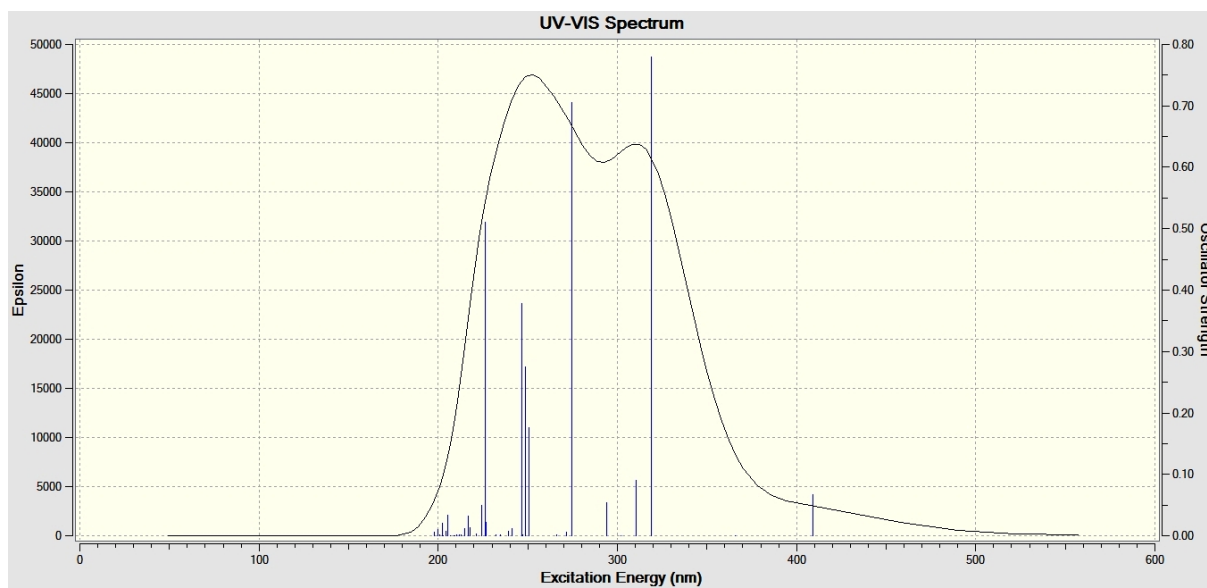

**Fig. S5.** The theoretical UV-Vis spectra for HNAPP of KETO form.

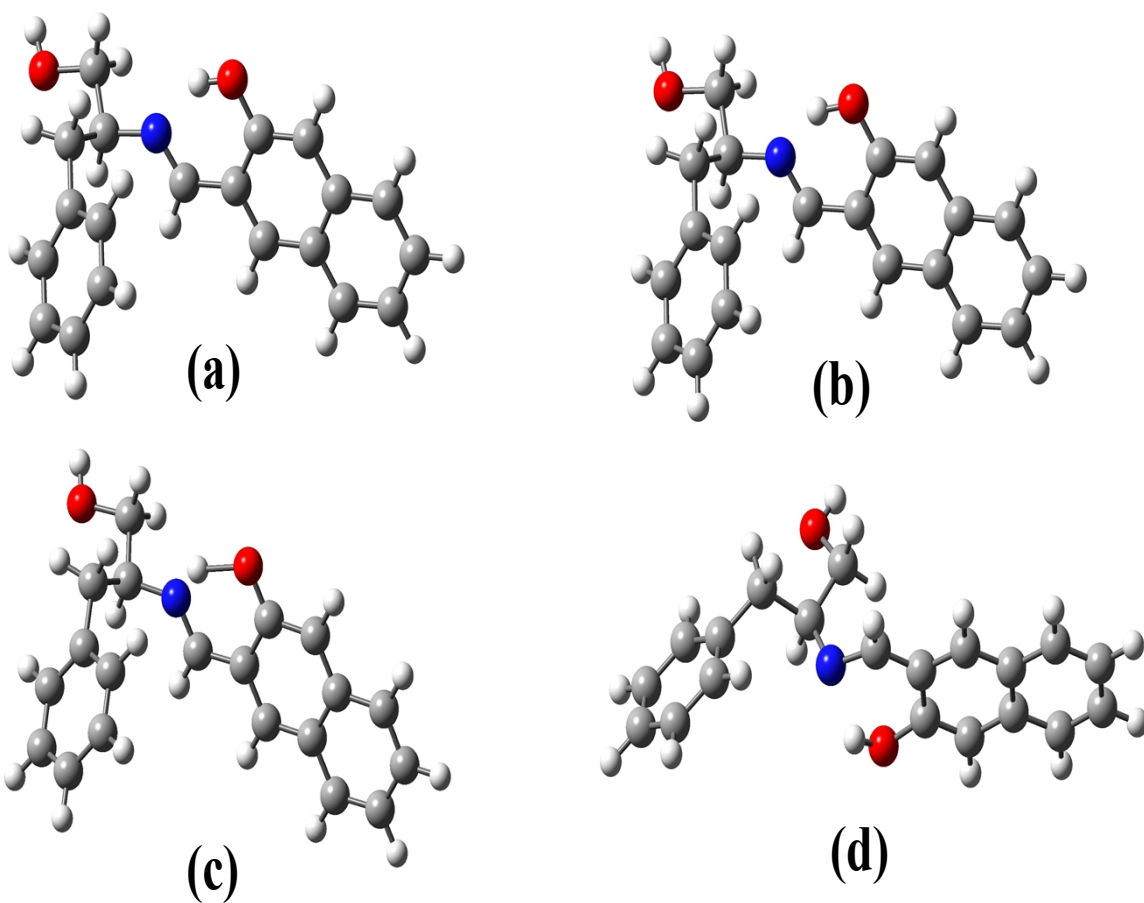

**Fig. S6** The optimized ground state structure ( $S_0$ ) of HNAPP in DMF (a), MeOH (b) and DCM (c); The optimized structure of first excited state ( $S_1$ ) of HNAPP in DCM (d); [N: Blue, O: Red, C: Grey and H: White atom].

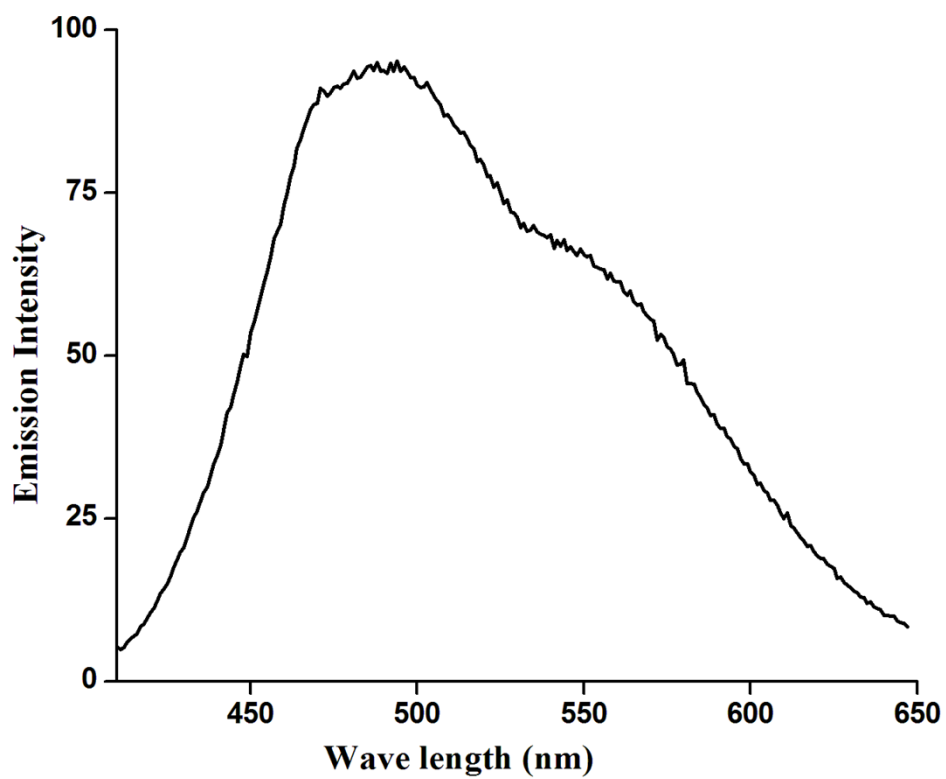

**Fig.S6** Emission spectra of HNAPP in DCM at room temperature.
